# Supplementary material for: FMT capsules (MBK-01) compared to fidaxomicin for the treatment of primary and recurrent Clostridioides difficile infection
Source: Research Square preprint supplement (doi:10.21203/rs.3.rs-7712660/v1), 2025-12-30
Supplement: Supplementary file 2 [file c13981a503e50b7c14693f1f.pdf]

# Supplementary Appendix

## Table of contents:

|                                                                   |          |
|-------------------------------------------------------------------|----------|
| <b>Inclusion and exclusion criteria for the participants.....</b> | <b>1</b> |
| <b>Table S1. Stool donor inclusion Criteria.....</b>              | <b>2</b> |
| <b>Table S2. Stool donor exclusion criteria. ....</b>             | <b>2</b> |

## Inclusion and exclusion criteria for the participants

### Inclusion criteria:

1. Patients of both genders, over 18 years.
2. Patients that undergo an episode of CD infection (either the first episode or subsequent recurrences).
3. Presence of an episode of diarrhea, defined as  $\geq 3$  stools/24 hours, at the beginning of the episode.
4. Confirmation of the presence of CD toxin A and/or B in feces, by a direct toxin detection test or by PCR for the detection of toxin's producing genes, at the start of the episode that is going to be treated in the clinical trial (the toxin test must be positive within 7 days prior to the enrollment of the patient).

### Exclusion criteria:

1. Previous FMT.
2. Transplanted patients, except those with a solid organ transplant of more than 2 years, with good organ function.
3. Absolute neutrophil count  $< 500$  cells / $\mu$ L at the time of the enrolment in the study.
4. Pregnancy, breastfeeding, or pregnancy intentions over the course of the study.

5. Active treatment with bile acid sequestrants.
6. Positive patients for HIV except those patients with lymphocytes T CD4 count >200 cells/ $\mu$ L and viral load less than 20 copies.
7. Swallowing dysfunction or no oral motor coordination.
8. Patient admitted in an intensive care unit or expected to be admitted in an intensive care unit due to serious illness.
9. History of significant medical conditions that would not allow an adequate evaluation or follow-up of the patient.

**Table S1. Stool donor inclusion Criteria.**

| <b>Inclusion Criteria</b>                                           |
|---------------------------------------------------------------------|
| Age 18-50 years (50-60 if screening for negative colorectal cancer) |
| Body mass index (BMI) 18-30 kg/m <sup>2</sup>                       |
| Ability to donate 2 to 5 times a week                               |
| Good overall health                                                 |

**Table S2. Stool donor exclusion criteria.**

| <b>Exclusion Criteria</b>                                                                                                                                                                    |
|----------------------------------------------------------------------------------------------------------------------------------------------------------------------------------------------|
| <b><i>Infectious</i></b>                                                                                                                                                                     |
| History of infection or exposure to HIV, hepatitis B, or hepatitis C, syphilis, primate T-lymphotropic viruses (PTLVs), malaria, or tuberculosis                                             |
| At-risk sexual contacts or behaviors or partner change in the past three months                                                                                                              |
| Sexual contact, in the past 12 months, with someone who has used needles for drug or steroid use or for anything else that has not been prescribed by a doctor                               |
| Sexual contact, within the past 12 months, with someone with HIV, Hepatitis B, or Hepatitis C, with hemophilia, or receiving clotting factor concentrates. Contacting someone with hepatitis |

| <b>Exclusion Criteria</b>                                                                                                                                                                         |
|---------------------------------------------------------------------------------------------------------------------------------------------------------------------------------------------------|
| Infection and/or treatment of any sexually transmitted disease within the past 12 months                                                                                                          |
| Illicit drug use within the past three months                                                                                                                                                     |
| Previous organ or tissue transplantation                                                                                                                                                          |
| Have been in contact, within the past six months, with blood from another person, or have been punctured/cut with material that could be contaminated with blood or fluids from another person    |
| Tattoos, piercings, acupuncture, or accidental needle stick within the past 12 months                                                                                                             |
| Risk factors for Creutzfeldt-Jakob disease                                                                                                                                                        |
| Recent gastrointestinal infection (Rotavirus, <i>Giardia lamblia</i> , etc.)                                                                                                                      |
| Travel in the past 12 months to tropical countries with endemic diarrheal illnesses or high-risk of traveler's diarrhea                                                                           |
| Vaccination within the last 12 months with live attenuated vaccines or any injection                                                                                                              |
| Healthcare personnel or workers from hospitals and healthcare institutions (risk of transmission of multi-resistant microorganisms) or if working with animals (risk of transmission of zoonoses) |
| Those who have been in a prison or reformatory facility within the past 12 months or have been under arrest for more than 72 hours                                                                |
| Those who have experienced malaria, Chagas disease, or babesiosis or trypanosomiasis                                                                                                              |
| Those who have suffered, or have anyone in their environment who has suffered, COVID-19                                                                                                           |
| If you have been exposed to or are infected with monkey smallpox virus                                                                                                                            |
| Fever, frequent cough, or feeling short of breath in the past two weeks                                                                                                                           |
| Working with animals (to avoid the risk of transmission of zoonoses)                                                                                                                              |
| <b><i>Gastrointestinal comorbidities</i></b>                                                                                                                                                      |
| Inflammatory bowel disease                                                                                                                                                                        |
| Irritable bowel syndrome, chronic functional constipation, or chronic functional diarrhea (per ROME IV)                                                                                           |
| Celiac disease and other chronic digestive disorders                                                                                                                                              |
| History or high risk for gastrointestinal cancer or polyposis                                                                                                                                     |

| <b>Exclusion Criteria</b>                                                                                                          |
|------------------------------------------------------------------------------------------------------------------------------------|
| A family member diagnosed with Crohn's disease or ulcerative colitis (parents, siblings or children)                               |
| Family history of colon cancer (parents, siblings or children)                                                                     |
| Diarrhea, blood in stool, abdominal pain, or other significant digestive symptomatology within the past three months, or routinely |
| <b><i>Consumption of drugs that may alter gut microbiota</i></b>                                                                   |
| Use of antibiotics, antifungals, or antivirals within the past three months                                                        |
| Use of Proton-pump inhibitors (PPIs) in the past three months                                                                      |
| Use of systemic anti-cancer agents within the past three months                                                                    |
| Taking medications related to gastric reflux, heartburn, within the past three months                                              |
| Use of immunosuppressive medication or chemotherapy within the past three months                                                   |
| <b><i>Other reasons</i></b>                                                                                                        |
| Legal inability to give consent                                                                                                    |
| Active cancer process or cancer history in the past 10 years                                                                       |
| Consumer of >28 Alcohol Standard Drink Unit (SDU) per week                                                                         |
| Have had surgery for something in the past three months                                                                            |
| Gastroscopy or colonoscopy within the past three months                                                                            |
| Prior major digestive system surgery (excluding appendectomy) (parents, siblings or children)                                      |
| Have had a transplant within the last 12 months                                                                                    |
| Evolved liver disease                                                                                                              |
| Chronic kidney disease                                                                                                             |
| Autoimmune and systemic diseases                                                                                                   |
| Chronic or autoimmune systemic diseases with GI involvement                                                                        |
| Diabetes mellitus                                                                                                                  |
| Metabolic syndrome                                                                                                                 |
| Neurological, neurodegenerative or psychiatric diseases                                                                            |

| Exclusion Criteria                                                                                                             |
|--------------------------------------------------------------------------------------------------------------------------------|
| Symptoms of eczema or psoriasis in the past eight weeks                                                                        |
| Food, seasonal, animal, medication, latex, dust, other allergies                                                               |
| Asthma in the past 12 months                                                                                                   |
| Experienced symptoms or taken treatment in the past 12 months for attention deficit, hyperactivity, anxiety, and/or depression |
| Pregnancy or delivery or termination of pregnancy in the last six months                                                       |
| Vaccinations not correctly received per the vaccine schedule                                                                   |
| Significant vascular disease                                                                                                   |
